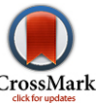

## Correction

# Correction: The Beginning of Metallurgy in the Southern Levant: A Late 6<sup>th</sup> Millennium CalBC Copper Awl from Tel Tsaf, Israel

## The PLOS ONE Staff

There is a typo in the penultimate sentence of the Abstract. The word “defused” should be replaced with the word “diffused.” Please see the correct sentence below:

“This rare finding indicates that metallurgy was first diffused to the southern Levant through exchange networks and only centuries later involved local production.”

## Reference

1. Garfinkel Y, Klimscha F, Shalev S, Rosenberg D (2014) The Beginning of Metallurgy in the Southern Levant: A Late 6<sup>th</sup> Millennium CalBC Copper Awl from Tel Tsaf, Israel. PLoS ONE 9(3): e92591. doi:10.1371/journal.pone.0092591

---

**Citation:** The PLOS ONE Staff (2014) Correction: The Beginning of Metallurgy in the Southern Levant: A Late 6<sup>th</sup> Millennium CalBC Copper Awl from Tel Tsaf, Israel. PLoS ONE 9(4): e96882. doi:10.1371/journal.pone.0096882

**Published:** April 28, 2014

**Copyright:** © 2014 The PLOS ONE Staff. This is an open-access article distributed under the terms of the Creative Commons Attribution License, which permits unrestricted use, distribution, and reproduction in any medium, provided the original author and source are credited.
